# Supplementary material for: Effect of β-Glucan Supplementation on Growth Performance and Intestinal Epithelium Functions in Weaned Pigs Challenged by Enterotoxigenic Escherichia coli
Source: MDPI journal article supplement (doi:10.3390/antibiotics11040519), 2022-04-13
Supplement: s1 [file s1]

**Table S1.** Primers sequences used for quantitative RT-PCR

| Gene                    | Primer sequence (5' –3')                                                                         | Annealing temperature (°C) | Product size (bp) |
|-------------------------|--------------------------------------------------------------------------------------------------|----------------------------|-------------------|
| $\beta$ -Actin          | F: TGGAACGGTGAAGGTGACAGC<br>R: GCTTTTGGAAGGCAGGGACT                                              | 60                         | 177               |
| <i>SGLT-1</i>           | F: CCACTTTCCTATAAAACCTCAC<br>R: CTCCATCAAACCTCCATCCTCAG                                          | 60                         | 151               |
| <i>GLUT-2</i>           | F: CCTGCTTGGTCTATCTGCTGTG<br>R: TTGATGCTTCTTCCCTTTCTTT                                           | 60                         | 156               |
| <i>CAT-1</i>            | F: TGCCCATACTTCCCGTCC<br>R: GGTCCAGGTTACCGTCAG                                                   | 60                         | 192               |
| <i>LAT-1</i>            | F: GCCCATTGTCACCATCATC<br>R: GAGCCCACAAAGAAAAGC                                                  | 60                         | 216               |
| <i>FATP-1</i>           | F: GGAGTAGAGGGCAAAGCAGG<br>R: AGGTCTGGCGTGGGTCAAAG                                               | 60                         | 208               |
| <i>FATP-4</i>           | F: TTCATCAAGACGGTCAGGCG<br>R: AGACGGTGGCAGCGAATAAG                                               | 60                         | 133               |
| <i>ZO-1</i>             | F: CAGCCCCCGTACATGGAGA<br>R: GCGCAGACGGTGTTTCATAGTT                                              | 60                         | 114               |
| Occludin                | F: CTACTCGTCCAACGGGAAAAG<br>R: ACGCCTCCAAGTTACCACTG                                              | 60                         | 158               |
| Claudin-1               | F: GCCACAGCAAGGTATGGTAAC<br>R: AGTAGGGCACCTCCCAGAAG                                              | 60                         | 140               |
| MUC2                    | GGTCATGCTGGAGCTGGACAGT<br>TGCCTCCTCGGGGTCGTCAC                                                   | 59                         | 181               |
| Total bacteria          | F: ACTCCTACGGGAGGCAGCAG<br>R: ATTACCGCGGCTGCTGG                                                  | 60                         | 200               |
| <i>Lactobacillus</i>    | F: GAGGCAGCAGTAGGGAATCTTC<br>R: CAACAGTTACTCTGACACCCGTTCTTC<br>P: AAGAAGGGTTTCGGCTCGTAAAACTCTGTT | 60                         | 126               |
| <i>Escherichia coli</i> | F: CATGCCGCGTGTATGAAGAA<br>R: CGGGTAACGTCAATGAGCAAA<br>P: AGGTATTAACCTTTACTCCCTTCCTC             | 60                         | 96                |
| <i>Bifidobacterium</i>  | F: CGCGTCCGGTGTGAAAG<br>R: CTTCCCGATATCTACACATTCCA                                               | 60                         | 121               |

|                                                                                                                                                                                                                                                       |                           |    |    |
|-------------------------------------------------------------------------------------------------------------------------------------------------------------------------------------------------------------------------------------------------------|---------------------------|----|----|
|                                                                                                                                                                                                                                                       | P: ATTCCACCGTTACACCGGGAA  |    |    |
|                                                                                                                                                                                                                                                       | F: GCAACGAGCGCAACCCTTGA   |    |    |
| <i>Bacillus</i>                                                                                                                                                                                                                                       | R: TCATCCCCACCTTCCTCCGGT  | 60 | 92 |
|                                                                                                                                                                                                                                                       | P: CGGTTTGTACCGGCAGTCACCT |    |    |
| <hr/>                                                                                                                                                                                                                                                 |                           |    |    |
| ZO-1, zonula occludens-1; FATP1, Fatty acid transport protein-1; FATP4, Fatty acid transportprotein-4;<br>LAT1, L-type amino acid transporter-1; CAT1, cationic amino acid transporter-1; MUC2, mucin-2;<br>SGLT1,sodium glucose transport protein-1; |                           |    |    |
